# Supplementary material for: Sol-Gel Synthesis of Ceria-Zirconia-Based High-Entropy Oxides as High-Promotion Catalysts for the Synthesis of 1,2-Diketones from Aldehyde
Source: MDPI journal article supplement (doi:10.3390/molecules26206115), 2021-10-10
Supplement: s1 [file s1]

# Sol-gel Synthesis of Ceria-Zirconia Based High Entropy Oxides as High Promotion Catalysts for the Synthesis of 1,2-Diketones from Aldehyde

Dalibor Tatar <sup>1</sup>, Jelena Kojčinović <sup>1</sup>, Berislav Marković <sup>1</sup>, Aleksandar Széchenyi <sup>1</sup>, Aleksandar Miletić <sup>2</sup>, Sándor Balázs Nagy <sup>3</sup>, Szilveszter Ziegenheim <sup>3</sup>, Imre Szenti <sup>4</sup>, Andras Sapi <sup>4</sup>, Ákos Kukovecz <sup>4</sup>, Kristijan Dinjar <sup>5</sup>, Yushu Tang <sup>6</sup>, David Stenzel <sup>6</sup>, Gábor Varga <sup>7, \*</sup>, and Igor Djerdj <sup>1, \*</sup>

<sup>1</sup> Department of Chemistry, Josip Juraj Strossmayer University of Osijek, Cara Hadrijana 8/A, HR-31000

Osijek, Croatia; [dtatar@kemija.unios.hr](mailto:dtatar@kemija.unios.hr) (D. T.), [jbijelic@kemija.unios.hr](mailto:jbijelic@kemija.unios.hr) (J. K.), [bmarkovi@kemija.unios.hr](mailto:bmarkovi@kemija.unios.hr) (B. M.), [szealex@kemija.unios.hr](mailto:szealex@kemija.unios.hr) (A. Sz.)

<sup>2</sup> Faculty of Technical Sciences, University of Novi Sad, Trg Dositeja Obradovića 6, SRB-21000 Novi Sad, Serbia; [aleksandarvmiletic@gmail.com](mailto:aleksandarvmiletic@gmail.com) (A. M.)

<sup>3</sup> Department of Organic Chemistry, University of Szeged, Dóm tér 8., H-6720 Szeged, Hungary; [sandorb@chem.u-szeged.hu](mailto:sandorb@chem.u-szeged.hu) (S. B. N.), [ziegenheimsz@chem.u-szeged.hu](mailto:ziegenheimsz@chem.u-szeged.hu) (Sz. Z.)

<sup>4</sup> Department of Applied and Environmental Chemistry, University of Szeged, Rerrich Béla sq. 1., H-6720 Szeged, Hungary; [sapia@chem.u-szeged.hu](mailto:sapia@chem.u-szeged.hu) (A. S.), [kakos@chem.u-szeged.hu](mailto:kakos@chem.u-szeged.hu) (Á. K.), [szentiimre@gmail.com](mailto:szentiimre@gmail.com) (I. S.)

<sup>5</sup> Department of Otorhinolaryngology and Maxillofacial Surgery, Faculty of Medicine, Josip Juraj Strossmayer University of Osijek, Cara Hadrijana 10/E, HR-31000 Osijek, Croatia; [kristijan.dinjar@kbco.hr](mailto:kristijan.dinjar@kbco.hr) (K. D.)

<sup>6</sup> Karlsruhe Institute of Technology (KIT), Institute of Nanotechnology, Hermann-von-Helmholtz-Platz 1, DE-76344 Eggenstein-Leopoldshafen, Germany; [yushu.tang@kit.edu](mailto:yushu.tang@kit.edu) (Y. T.), [david.stenzel@kit.edu](mailto:david.stenzel@kit.edu) (D. S.)

<sup>7</sup> Department of Physical Chemistry and Materials Science, University of Szeged, Rerrich Béla sq. 1., H-6720 Szeged, Hungary

\* Correspondence: [gabor.varga5@chem.u-szeged.hu](mailto:gabor.varga5@chem.u-szeged.hu) (G. V.), [igor.djerdj@kemija.unios.hr](mailto:igor.djerdj@kemija.unios.hr) (I. Dj.); Tel.: +36-62-343-795 (G. V.), +385-31-399-975 (I. Dj.)

**Table S1.** Rietveld refinement parameters and crystallographic data obtained from the PXRD pattern.

| Compound                                           | CZLEY         | CZLPY         | CZEYG         | CZLPG         |
|----------------------------------------------------|---------------|---------------|---------------|---------------|
| Space Group                                        | <i>Fm-3m</i>  |               |               |               |
| Crystal system                                     | Cubic         |               |               |               |
| Data collection range                              | 20 – 100°     |               |               |               |
| Phase composition (wt %)                           | 100           |               |               |               |
| Molecular weight                                   | 138.23        | 136.01        | 141.91        | 149.68        |
| Z                                                  | 8             | 8             | 8             | 8             |
| Lattice parameters (Å)                             | a = 5.4558(2) | a = 5.4517(2) | a = 5.4583(2) | a = 5.4601(2) |
| Cell volume (Å <sup>3</sup> )                      | 162.394(6)    | 162.035(6)    | 162.616(6)    | 162.777(6)    |
| Calculated density (g/cm <sup>3</sup> )            | 6.624         | 6.235         | 6.582         | 6.938         |
| No. of parameters refined                          | 16            | 15            | 16            | 16            |
| No. of bond lengths restrained                     | 0             | 0             | 0             | 0             |
| No. of bond angles restrained                      | 0             | 0             | 0             | 0             |
| Average apparent crystallite size (nm)             | 6             | 6             | 5             | 6             |
| Average apparent microstrains (×10 <sup>-4</sup> ) | 41.055        | 25.221        | 50.302        | 34.438        |
| R <sub>B</sub> (%)                                 | 1.06          | 1.37          | 1.01          | 1.35          |
| R <sub>P</sub> (%)                                 | 12.6          | 11.0          | 13.5          | 13.0          |
| R <sub>wp</sub> (%)                                | 9.12          | 8.79          | 9.44          | 9.53          |
| R <sub>e</sub> (%)                                 | 8.62          | 8.37          | 10.0          | 10.3          |
| χ <sup>2</sup>                                     | 1.12          | 1.103         | 0.888         | 0.849         |

**Table S2.** Relative oxygen vacancies concentration in HEOs, calculated from Raman spectra.

| Compound | Integral intensities ratio ( $I_D/I_{F2g}$ ) |
|----------|----------------------------------------------|
| CZLEY    | 1.30                                         |
| CZLPY    | 1.81                                         |
| CZEYG    | 1.44                                         |
| CZLPG    | 1.90                                         |

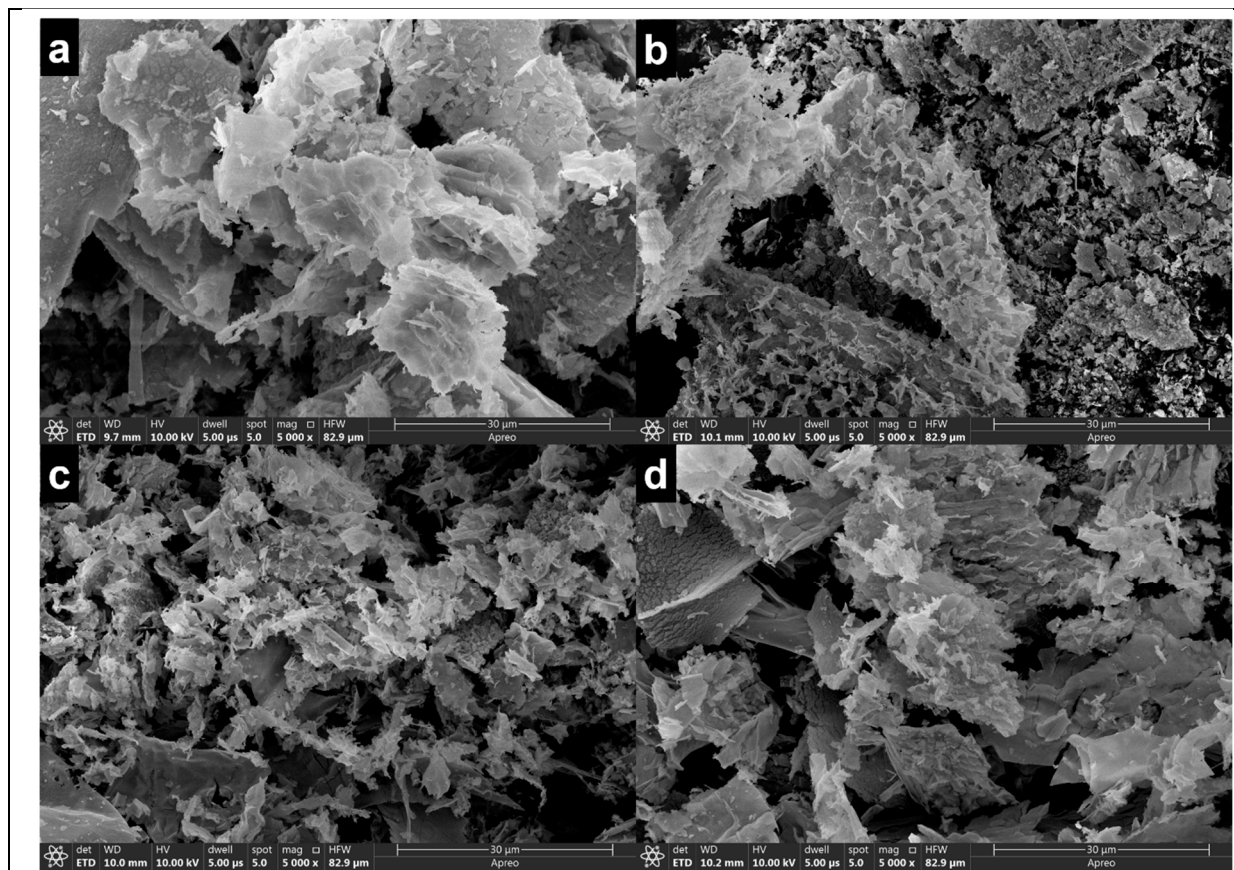

**Figure S1.** SEM images of: CZLEY (a), CZLPY (b), CZLPG (c), CZEYG (d).

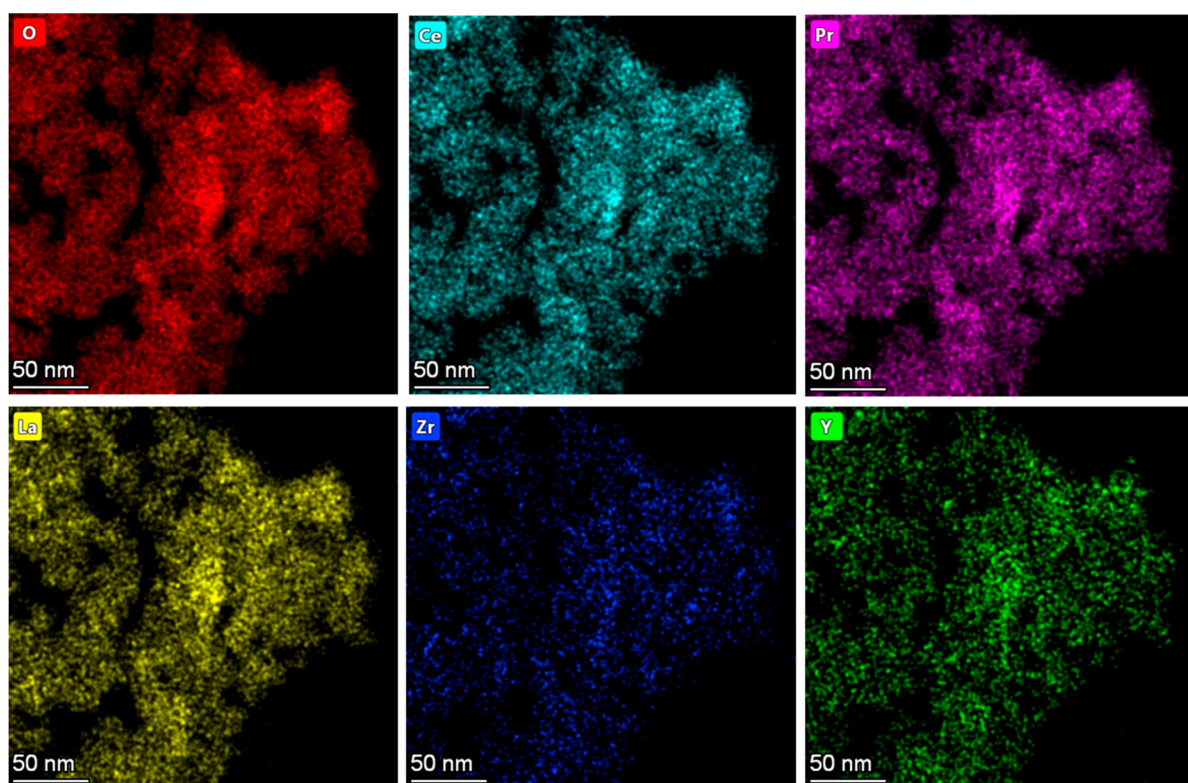

**Figure S2.** Qualitative EDX elemental maps of powder CZLPY sample.

**Table S3.** Quantitative results of EDX spectrum of CZLPY.<sup>a</sup>

| <b>Z</b> | <b>M(g/mol)</b> | <b>Element</b> | <b>Family</b> | <b>Atomic Fraction (%)</b> | <b>Nominal Atomic Fraction (%)</b> | <b>Mass Fraction (%)</b> |
|----------|-----------------|----------------|---------------|----------------------------|------------------------------------|--------------------------|
| 8        | 16              | <b>O</b>       | K             | 69.01                      | 66.65                              | 22.55                    |
| 39       | 88.91           | <b>Y</b>       | K             | 6.05                       | 6.67                               | 10.99                    |
| 40       | 91.22           | <b>Zr</b>      | K             | 4.82                       | 6.67                               | 8.98                     |
| 57       | 138.9           | <b>La</b>      | L             | 6.99                       | 6.67                               | 19.82                    |
| 58       | 140.1           | <b>Ce</b>      | L             | 6.16                       | 6.67                               | 17.64                    |
| 59       | 140.9           | <b>Pr</b>      | L             | 6.96                       | 6.67                               | 20.03                    |

<sup>a</sup>Standard deviation: <5% of atomic concentration.

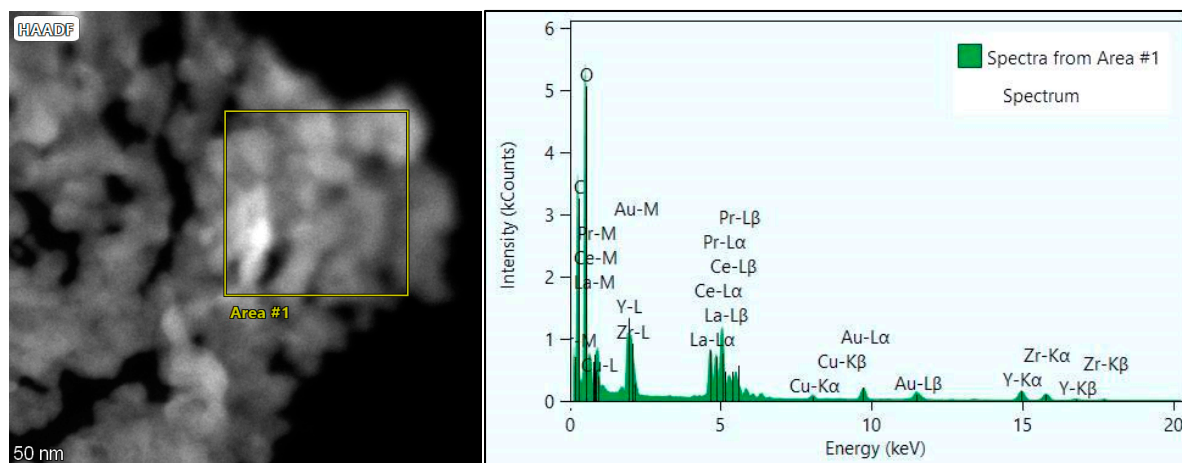

Figure S3. HAADF image and EDX spectrum of CZLPY.

**Table S4.** Results of ICP-MS analysis (mass fractions) of synthesized compounds compared to nominal (theoretical) values. <sup>a</sup>

| Compound<br>(nominal composition)                                                                    | Element | w (theoretical) / % | w (measured) / % |
|------------------------------------------------------------------------------------------------------|---------|---------------------|------------------|
| <b>Ce<sub>0.2</sub>Zr<sub>0.2</sub>La<sub>0.2</sub>Eu<sub>0.2</sub>Y<sub>0.2</sub>O<sub>2</sub></b>  | Ce      | 18,17               | 15,52            |
|                                                                                                      | Zr      | 11,83               | 9,61             |
|                                                                                                      | La      | 18,01               | 18,61            |
|                                                                                                      | Eu      | 19,71               | 19,74            |
|                                                                                                      | Y       | 11,53               | 11,13            |
| <b>Ce<sub>0.2</sub>Zr<sub>0.2</sub>La<sub>0.2</sub>Pr<sub>0.2</sub>Y<sub>0.2</sub>O<sub>2</sub></b>  | Ce      | 18,43               | 15,43            |
|                                                                                                      | Zr      | 12,00               | 11,73            |
|                                                                                                      | La      | 18,28               | 18,81            |
|                                                                                                      | Pr      | 18,54               | 19,22            |
|                                                                                                      | Y       | 11,70               | 11,69            |
| <b>Ce<sub>0.2</sub>Zr<sub>0.2</sub>Eu<sub>0.2</sub>Y<sub>0.2</sub>Gd<sub>0.2</sub>O<sub>2</sub></b>  | Ce      | 17,75               | 20,04            |
|                                                                                                      | Zr      | 11,56               | 11,08            |
|                                                                                                      | Eu      | 19,25               | 17,97            |
|                                                                                                      | Y       | 11,26               | 11,87            |
|                                                                                                      | Gd      | 19,92               | 16,68            |
| <b>Ce<sub>0.2</sub>Zr<sub>0.2</sub>La<sub>0.2</sub>Pr<sub>0.2</sub>Gd<sub>0.2</sub>O<sub>2</sub></b> | Ce      | 16,91               | 20,21            |
|                                                                                                      | Zr      | 11,01               | 11,62            |
|                                                                                                      | La      | 16,76               | 19,96            |
|                                                                                                      | Pr      | 17,00               | 19,88            |
|                                                                                                      | Gd      | 18,98               | 21,62            |

<sup>a</sup> The relative standard deviation is 10-30%



**Table S5.** Benzaldehyde direct conversion to benzil. Reaction conditions: 1 mmol benzaldehyde, 2cm<sup>3</sup> acetonitrile, 0.5 mmol DPPA, 5 mol% CZLPY catalyst, reflux temperature, 24 h.

| Catalysts | Additive | Benzaldehyde conversion<br>(mol%) | Benzil selectivity<br>(mol%) |
|-----------|----------|-----------------------------------|------------------------------|
| —         | —        | —                                 | —                            |
| CZLPY     | —        | 11                                | 30                           |
| —         | DPPA     | 10                                | 20                           |
| CZLPY     | DPPA     | 80                                | 49                           |

**Table S6.** Benzaldehyde direct conversion to benzil. Screening of the reaction temperature. Reaction conditions: 1 mmol benzaldehyde, 2cm<sup>3</sup> acetonitrile, 0.5 mmol DPPA, 5 mol% CZLPY catalyst, 24 h.

| Reaction temperature (°C) | Benzaldehyde conversion (mol%) | Benzil selectivity (mol%) |
|---------------------------|--------------------------------|---------------------------|
| 10                        | 15                             | 16                        |
| 20                        | 35                             | 15                        |
| 30                        | 55                             | 20                        |
| <i>Reflux</i>             | <i>80</i>                      | <i>49</i>                 |

**Table S7.** Benzaldehyde direct conversion to benzil. Screening of the applied solvent. Reaction conditions: 1 mmol benzaldehyde, 2cm<sup>3</sup> solvent, 0.5 mmol DPPA, 5 mol% CZLPY catalyst, reflux temperature, 24 h.

| Solvents            | Benzaldehyde conversion (mol%) | Benzil selectivity (mol%) |
|---------------------|--------------------------------|---------------------------|
| 1,2-dichloromethane | 80                             | 49                        |
| DMSO                | 12                             | 40                        |
| DMF                 | —                              | —                         |
| <i>Acetonitrile</i> | 75                             | 52                        |
| Heptane             | —                              | —                         |
| EtOAc               | 4                              | 60                        |
| EtOH                | 1                              | 70                        |
| EtOAc : EtOH 3:1    | 15                             | 100                       |

**Table S8.** Benzaldehyde direct conversion to benzil. Screening of the reaction temperature (in acetonitrile). Reaction conditions: 1 mmol benzaldehyde, 2cm<sup>3</sup> acetonitrile, 0.5 mmol DPPA, 5 mol% CZLPY catalyst, 24 h.

| Reaction temperature (°C) | Benzaldehyde conversion (mol%) | Benzil selectivity (mol%) |
|---------------------------|--------------------------------|---------------------------|
| 25                        | 20                             | 15                        |
| 40                        | 35                             | 18                        |
| 55                        | 59                             | 19                        |
| <i>Reflux</i>             | 75                             | 52                        |

**Table S9.** Benzaldehyde direct conversion to benzil. Screening of the catalyst loading. Reaction conditions: 1 mmol benzaldehyde, 2cm<sup>3</sup> acetonitrile, 0.25 mmol benzoic acid, CZLPY catalyst, reflux temperature, 24 h.

| Catalyst loading (mol%) | Benzaldehyde conversion (mol%) | Benzil selectivity (mol%) |
|-------------------------|--------------------------------|---------------------------|
| 1.25                    | 30                             | 91                        |
| 2.5                     | 50                             | 88                        |
| 5                       | 90                             | 90                        |
| 10                      | 93                             | 61                        |

**Table S10.** Benzaldehyde direct conversion to benzil. Screening of the applied catalyst. Reaction conditions: 1 mmol benzaldehyde, 2cm<sup>3</sup> acetonitrile, 0.25 mmol benzoic acid, 5 mol% catalyst, reflux temperature, 24 h.

| Catalysts                                                                | Benzaldehyde conversion (mol%) | Benzil selectivity (mol%) |
|--------------------------------------------------------------------------|--------------------------------|---------------------------|
| CZLPY                                                                    | 90                             | 90                        |
| CZEYG                                                                    | 60                             | 87                        |
| CZLPG                                                                    | 40                             | 88                        |
| CZLEY                                                                    | 25                             | 84                        |
| CeO <sub>2</sub>                                                         | 23                             | 85                        |
| La <sub>2</sub> O <sub>3</sub>                                           | 20                             | 86                        |
| ZrO <sub>2</sub>                                                         | 41                             | 95                        |
| Eu <sub>2</sub> O <sub>3</sub>                                           | —                              | —                         |
| Y <sub>2</sub> O <sub>3</sub>                                            | —                              | —                         |
| CeO <sub>2</sub> :La <sub>2</sub> O <sub>3</sub> 1:1                     | 24                             | 84                        |
| CeO <sub>2</sub> :ZrO <sub>2</sub> 1:1                                   | 48                             | 86                        |
| ZrO <sub>2</sub> :La <sub>2</sub> O <sub>3</sub> 1:1                     | 43                             | 88                        |
| CeO <sub>2</sub> :La <sub>2</sub> O <sub>3</sub> :ZrO <sub>2</sub> 1:1:1 | 45                             | 89                        |

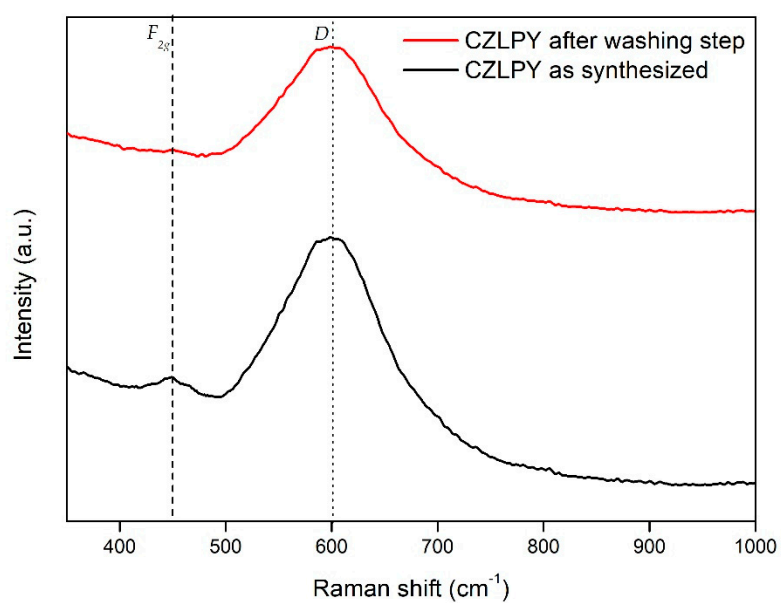

**Figure S4.** Compared Raman spectra of CZLPY catalyst as synthesized and after washing step.
